# Supplementary material for: Bi19S27I3 nanorods: a new candidate for photothermal therapy in the first and second biological near-infrared windows
Source: Royal Society of Chemistry journal article supplement (doi:10.1039/d0nr09137e), 2021-01-01
Supplement: d0nr09137e1.pdf [file d0nr09137e1.pdf]

## Electronic Supplementary Information

### **Bi<sub>19</sub>S<sub>27</sub>I<sub>3</sub> nanorods: a new candidate for photothermal therapy in the first and second biological near-infrared windows**

Jinsong Xiong, Qinghuan Bian, Shuijin Lei,\* Yatian Deng, Kehan Zhao, Shunqiang Sun, Qi  
Fu, Yanhe Xiao and Baochang Cheng

*School of Materials Science and Engineering, Nanchang University, Nanchang, Jiangxi  
330031, China*

\* To whom correspondence should be addressed. E-mail: [shjlei@ncu.edu.cn](mailto:shjlei@ncu.edu.cn)

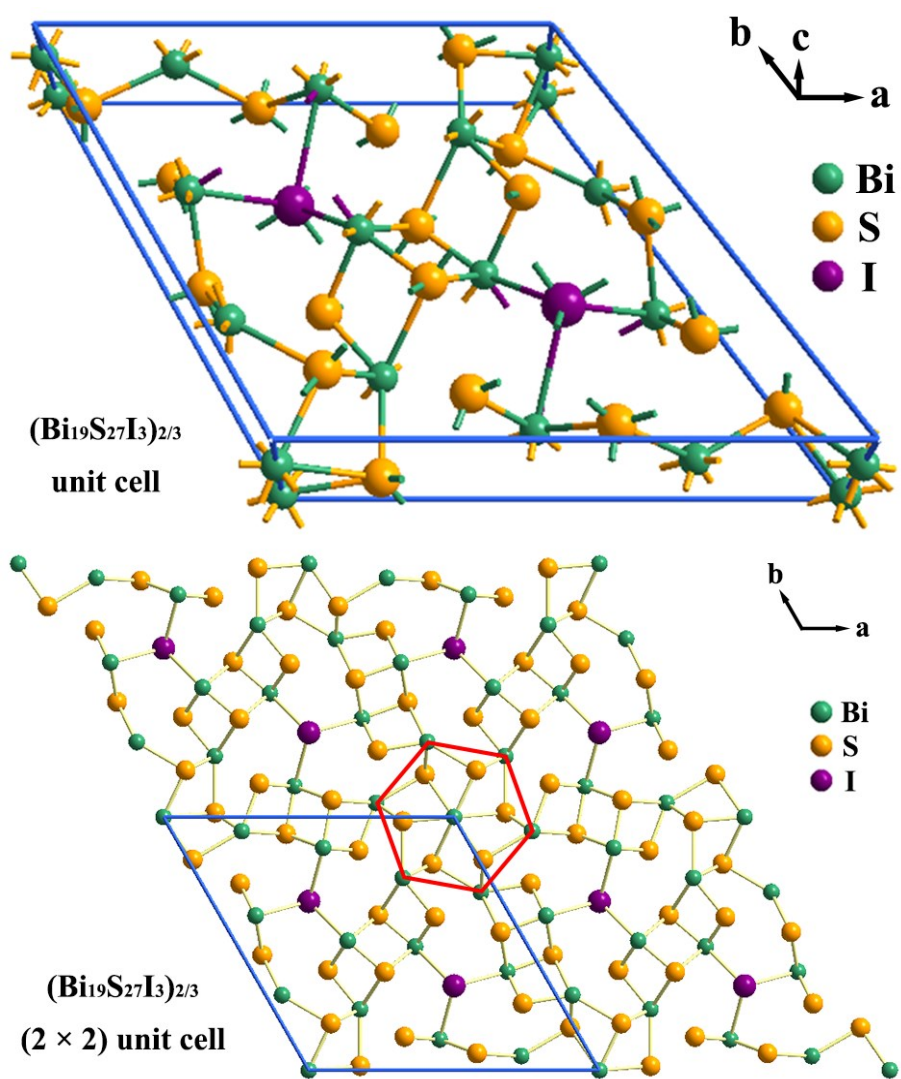

**Fig. S1** Crstal structure model of the hexagonal  $(\text{Bi}_{19}\text{S}_{27}\text{I}_3)_{2/3}$  phase.

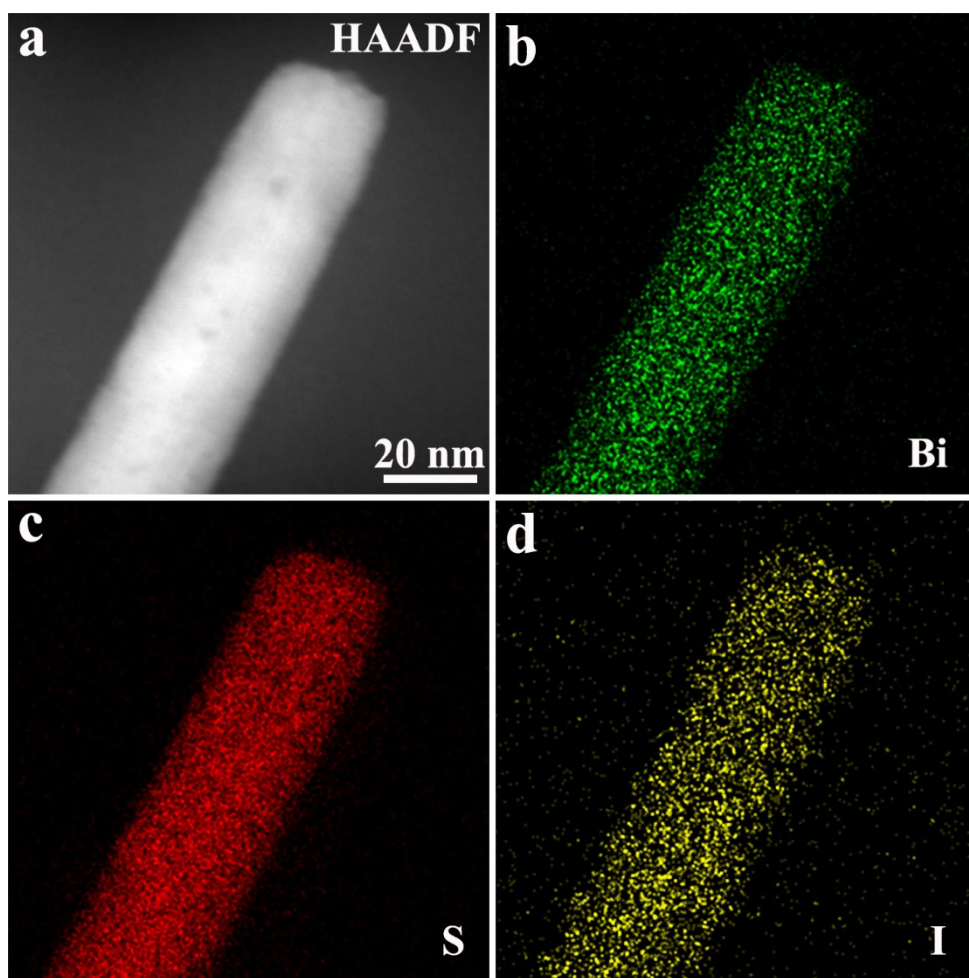

**Fig. S2** (a) HAADF image and the corresponding EDS elemental mapping images of (b) Bi, (c) S and (d) I of an individual  $\text{Bi}_{19}\text{S}_{27}\text{I}_3$  nanorod.

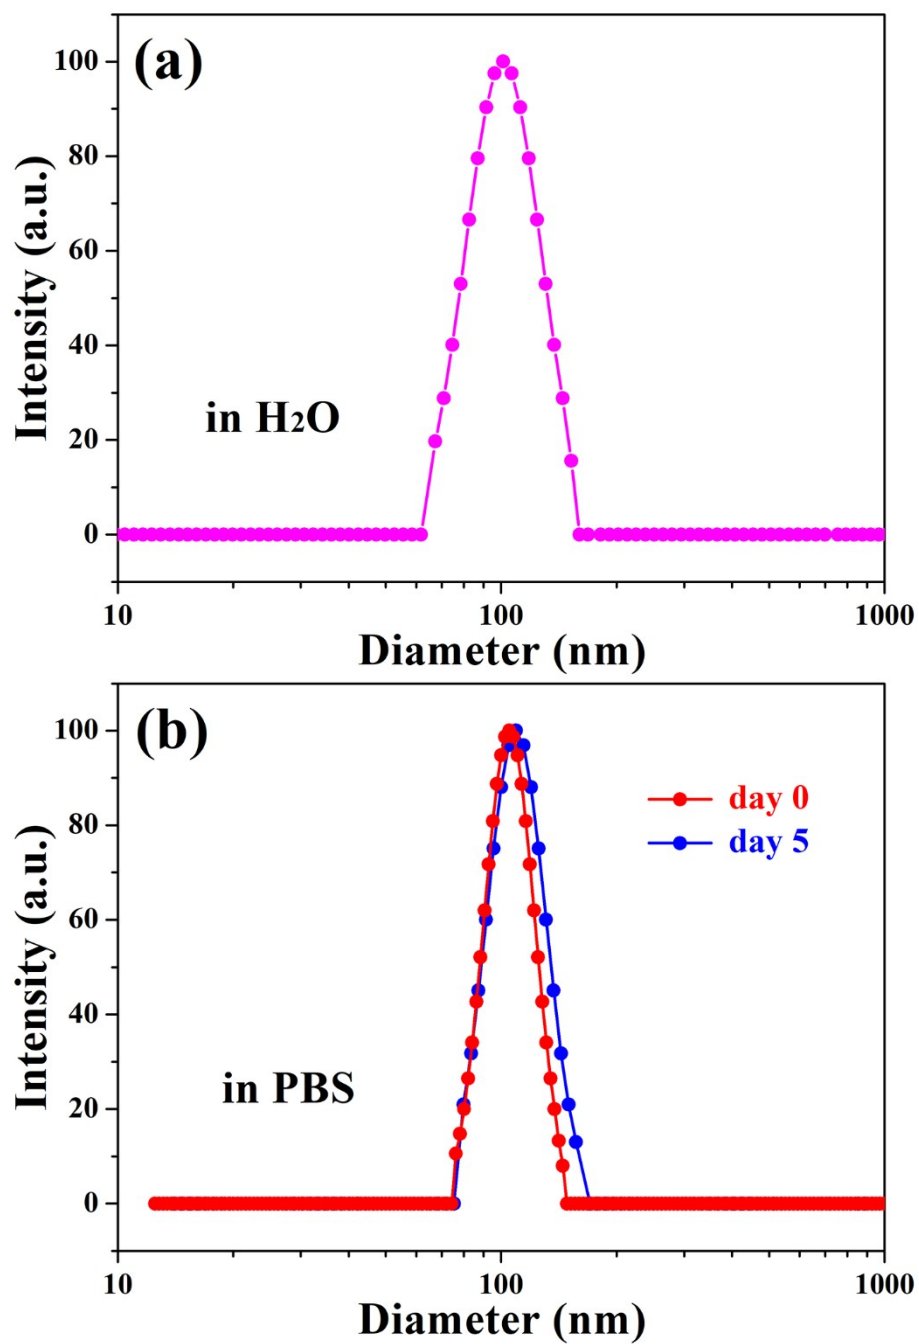

**Fig. S3** Size distribution of the prepared water-phase  $\text{Bi}_{19}\text{S}_{27}\text{I}_3$  nanorods in (a) water and (b) PBS solution.

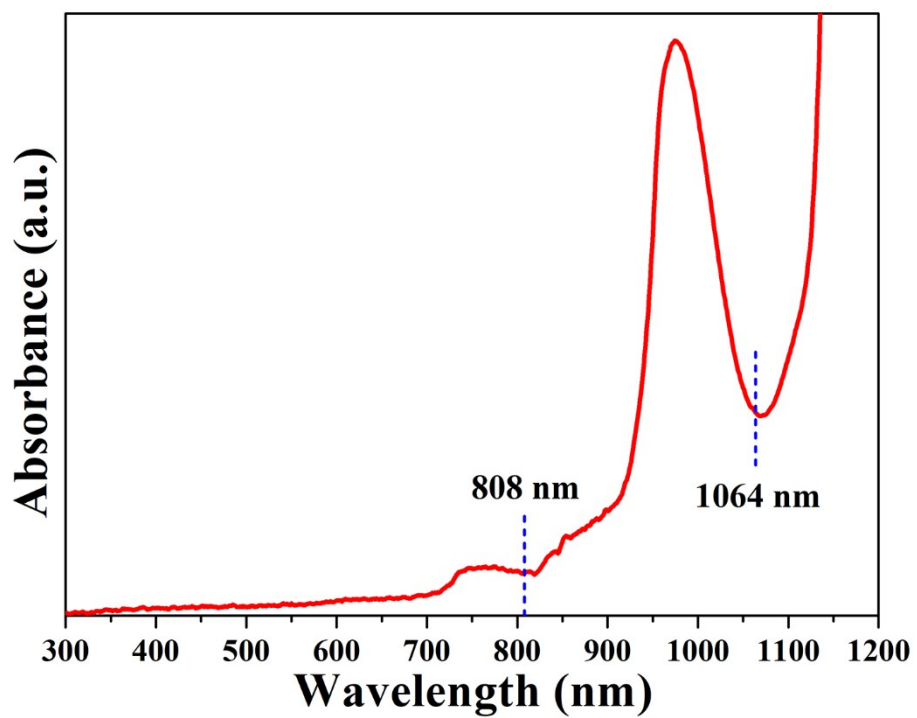

**Fig. S4** UV-Vis-NIR absorption spectrum of pure water.

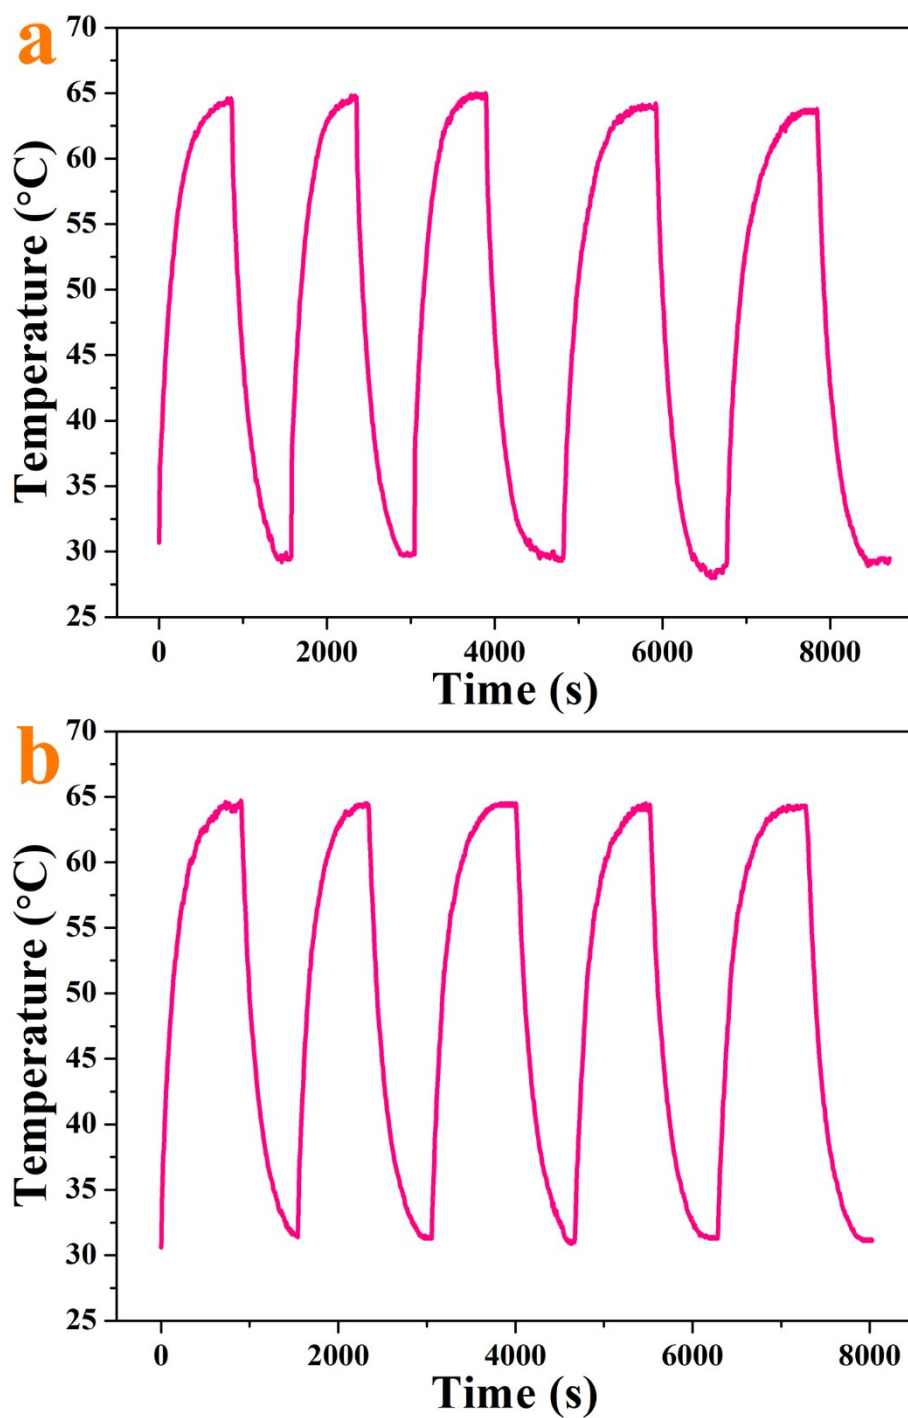

**Fig. S5** Photothermal stability of the  $\text{Bi}_{19}\text{S}_{27}\text{I}_3$  nanorods aqueous solution at a concentration of  $500 \mu\text{g mL}^{-1}$  under the irradiation of the (a) NIR-808 or (b) NIR-1064 laser at  $1.0 \text{ W cm}^{-2}$  over five ON-OFF cycles.

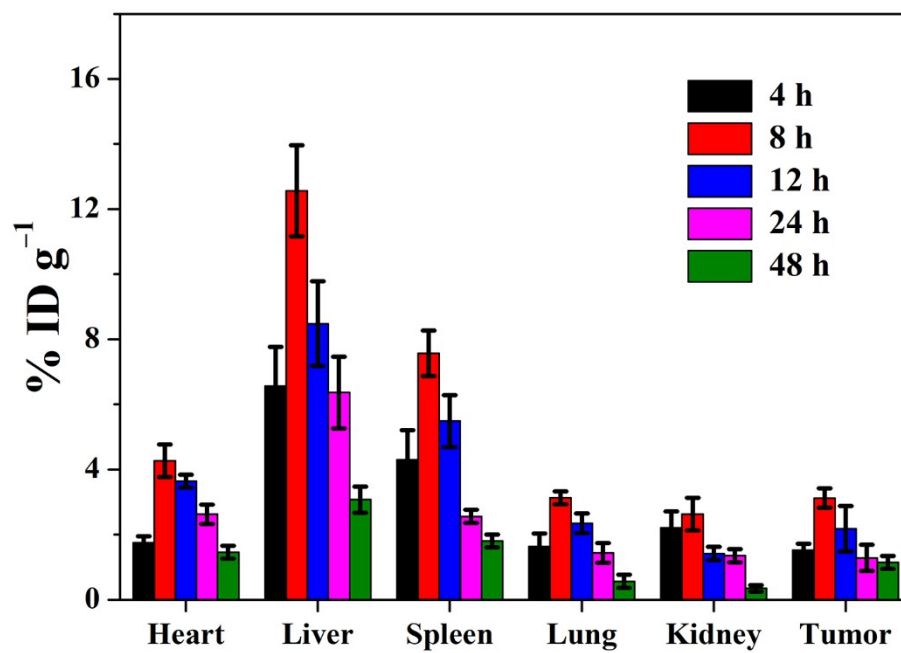

**Fig. S6** *In vivo* biodistribution of Bi<sub>19</sub>S<sub>27</sub>I<sub>3</sub> nanorods in the major organs of mice and tumors at different times after intravenous injection.
